# Supplementary material for: Fast ion transport and high capacitance of polystyrene-based hierarchical porous carbon electrode material for supercapacitors
Source: Royal Society of Chemistry journal article supplement (doi:10.1039/c0jm02044c), 2010-12-07
Supplement: c0jm02044c.pdf [file c0jm02044c.pdf]

## Electronic Supplementary Information (ESI)

# Fast Ion Transport and High Capacitance of Polystyrene-based Hierarchical Porous Carbon Electrode Material for Supercapacitors

Fei Xu, Rongjun Cai, Qingcong Zeng, Chong Zou, Dingcai Wu\*, Feng Li, Xiaoe Lu, Yeru Liang, Ruowen Fu\*

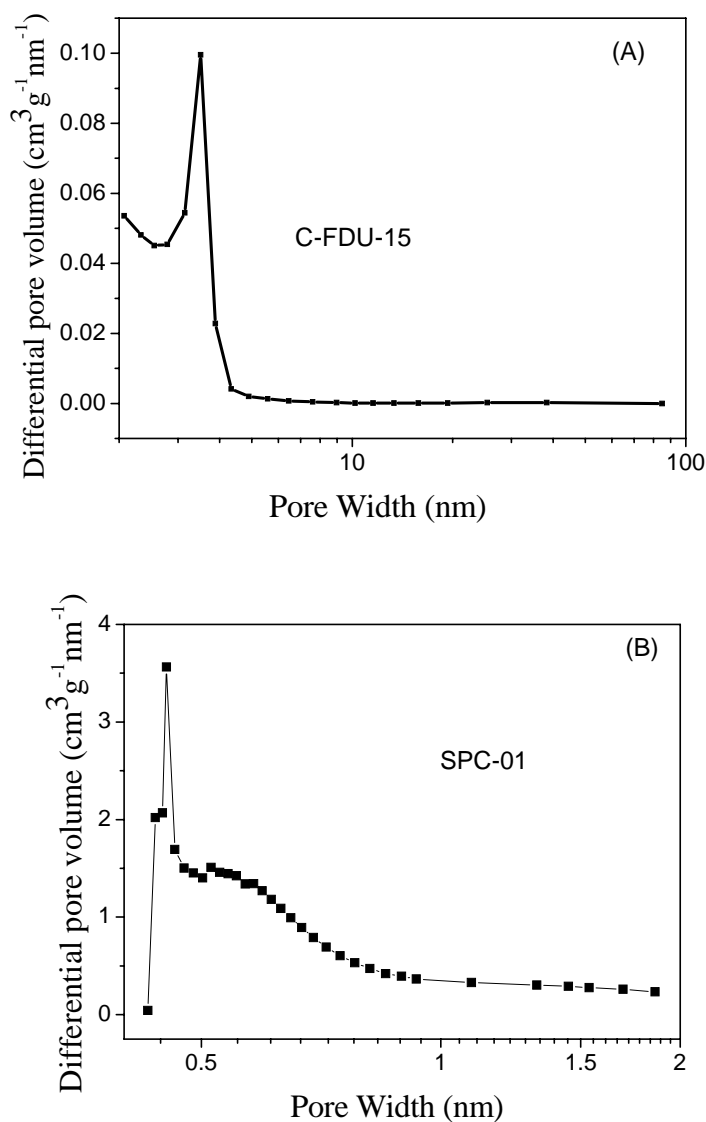

Fig. S1 (A) Barrett-Johnson-Halender pore size distribution of C-FDU-15 and (B) Horvath-Kawazoe pore size distribution of SPC-01, respectively.

---

\*Corresponding authors; Tel: +86-020-84112759, Fax : +86-020-84115112; E-mail :

[wudc@mail.sysu.edu.cn](mailto:wudc@mail.sysu.edu.cn) (D. Wu), [cesfrw@mail.sysu.edu.cn](mailto:cesfrw@mail.sysu.edu.cn) (R. Fu).

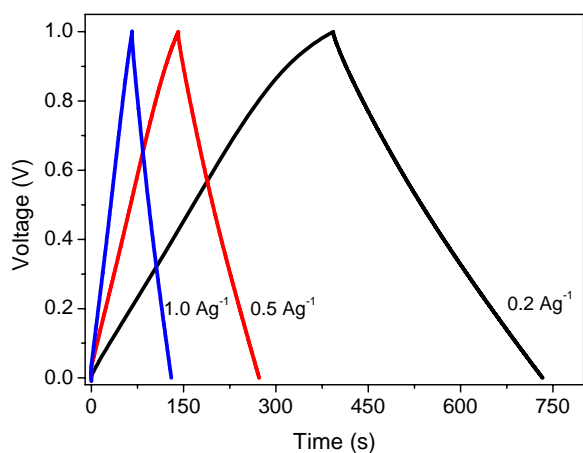

Fig. S2 Constant charging-discharging profiles of PS-HPC at different current densities over a voltage range of 0-1V in 6 molL<sup>-1</sup> KOH electrolyte. These tests were executed using Arbin instruments by assembling a symmetrical two-electrode supercapacitor using PS-HPC as electrode, which was prepared by pressing a mixture of 85 wt.% active material, 10 wt.% conductive carbon black and 5 wt.% polytetrafluoroethylene into a nickel foam current collector.

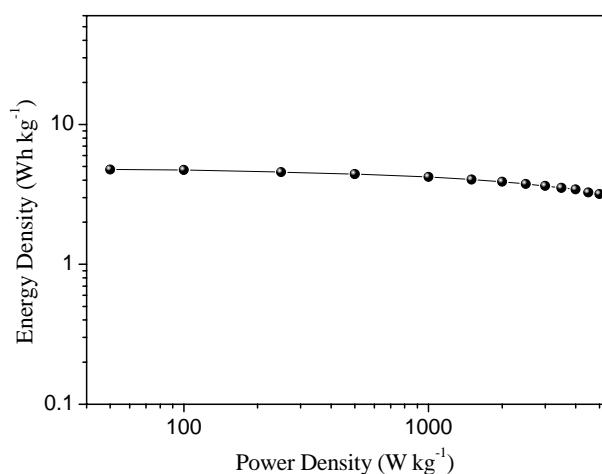

Fig. S3 Ragone plot for a supercapacitor with PS-HPC as electrodes. The energy and power densities are obtained, respectively, by the equation reported in the reference (*Angew. Chem. Int. Ed.* 2008, 47, 373-376.):  $E=CU^2/2$  and  $P=IU/2$ , where  $C$ ,  $U$ , and  $I$  are the gravimetric capacitance obtained by constant current charge-discharge test, the cell voltage (i.e., 1 V), and the current density.
